# Supplementary material for: Targeting the T-Lak cell originated protein kinase by OTS964 shrinks the size of power-law coded heterogeneous glioma stem cell populations
Source: PubMed Central journal article supplement (PMC5790444; doi:10.18632/oncotarget.23077), 2017-12-09
Supplement: oncotarget-09-3043-s001.pdf [file oncotarget-09-3043-s001.pdf]

## Targeting the T-Lak cell originated protein kinase by OTS964 shrinks the size of power-law coded heterogeneous glioma stem cell populations

### SUPPLEMENTARY MATERIALS

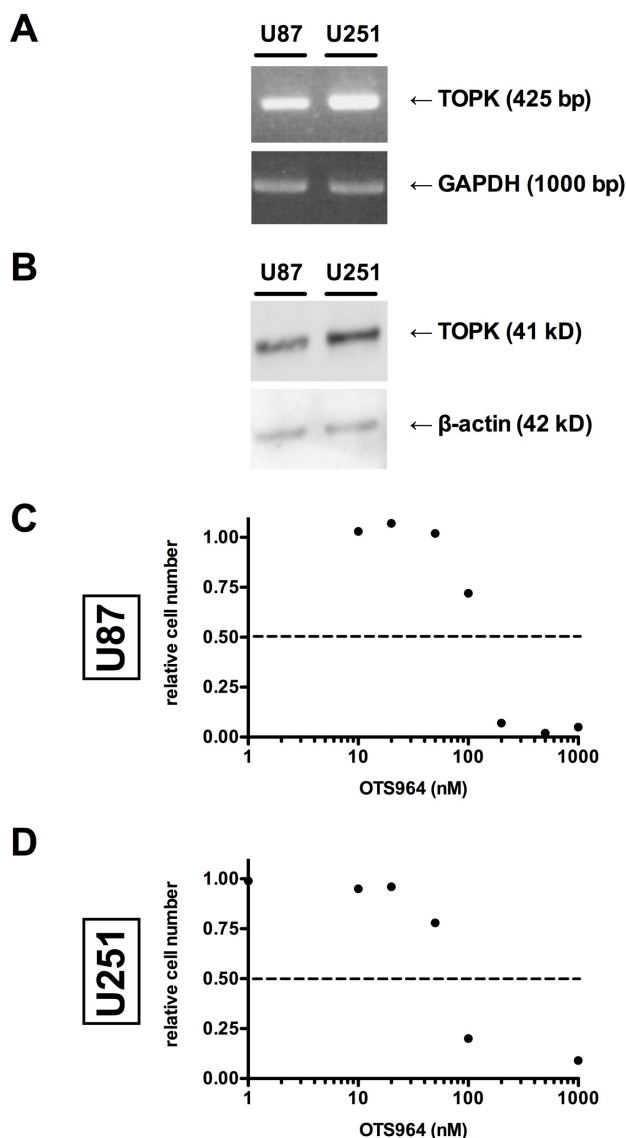

**Supplementary Figure 1: Expression of TOPK in the U87 and U251 glioma cells; *in vitro* cell viability assay for U87 and U251 glioma cells in various concentrations of OTS964.** (A, B), Expression of TOPK in U87 and U251 glioma cells in the semiquantitative RT-PCR analysis (A) and in the Western blot analysis (B), respectively. Expression of TOPK is more significant in the U251 than in the U87 glioma cells. (C, D) The graphs show the data of cell viability assay for U87 and U251 glioma cells in various concentrations of OTS964 (C and D for U87 and U251, respectively). The data allowed us to determine the  $IC_{50}$ s of U87 and U251 glioma cells as 125 nM and 68 nM, respectively.

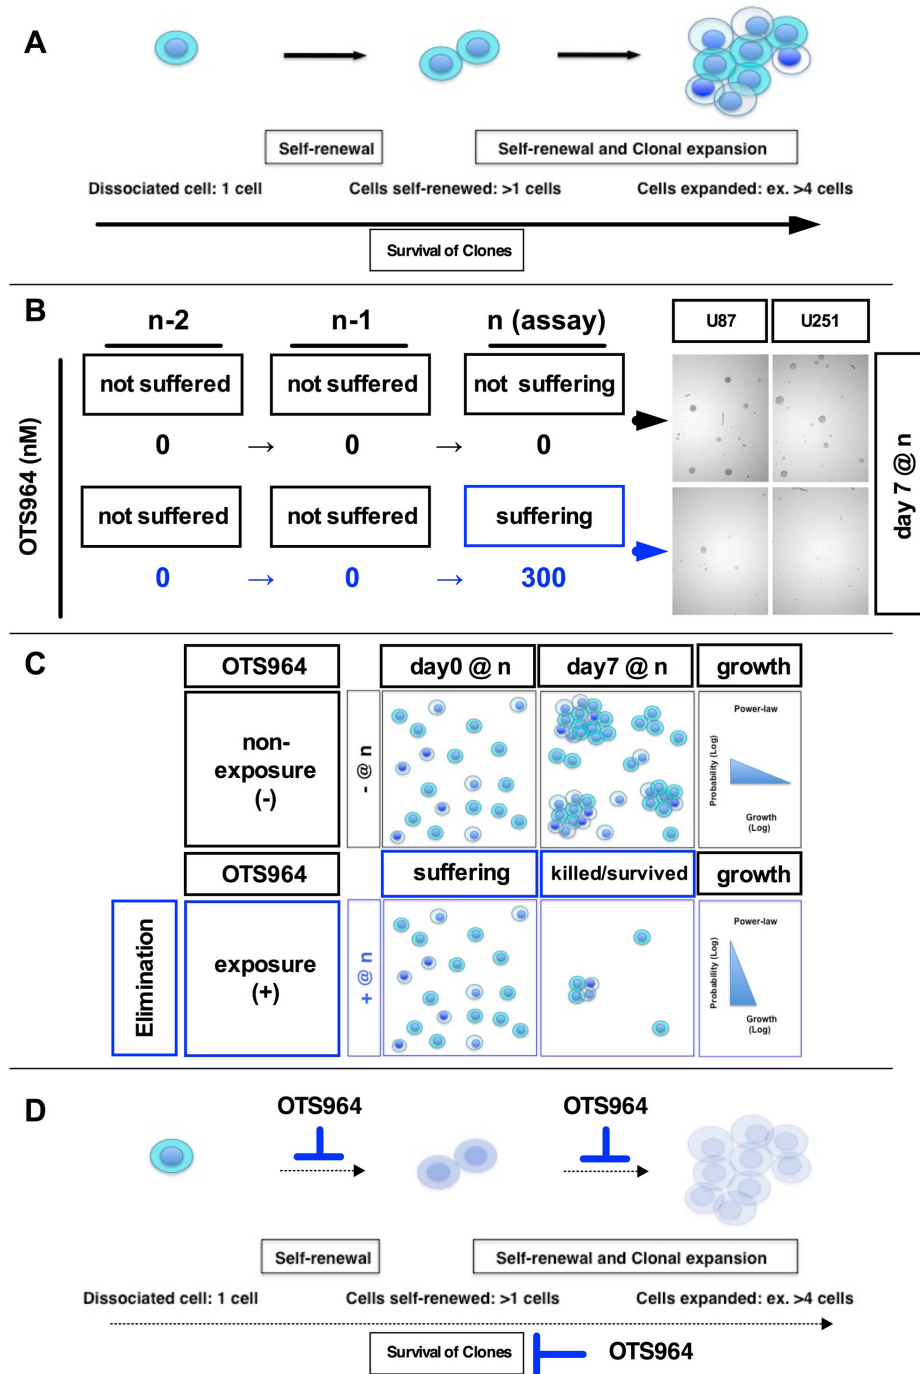

**Supplementary Figure 2: OTS964 kills and disturbs the growth of GS clones in the tumor neurosphere culture.**

(A) A schematic diagram of the growth of GS clones where GS clones survive, self-renew and expand for maintaining themselves. (B) The experimental paradigm for assaying an efficacy in size control of heterogeneous GS populations (left): GS clones, were assayed in the absence/presence of 300 nM of OTS964 (see above, written in black letters for the absence; and below, in blue letters for the presence, respectively) at an assay ( $n$ -th for an assay) generation. Representative pictures of U87- and U251-derived GS clones in the tumor neurosphere assay (right). (C) Size-reducing efficacy of OTS964 in GS populations: OTS964 killed GS clones, and disturbed the growth of suffering GS clones at the assay generations; while GS populations still maintained a power-law growth. The control (non-exposure: -) and the administration (exposure: +) experiments are in the black- and in the blue-lined boxes, respectively. (D) A schematic diagram of the efficacy of OTS964, where OTS964 suppresses the survival, the self-renewal and clonal expansion of GS clones.

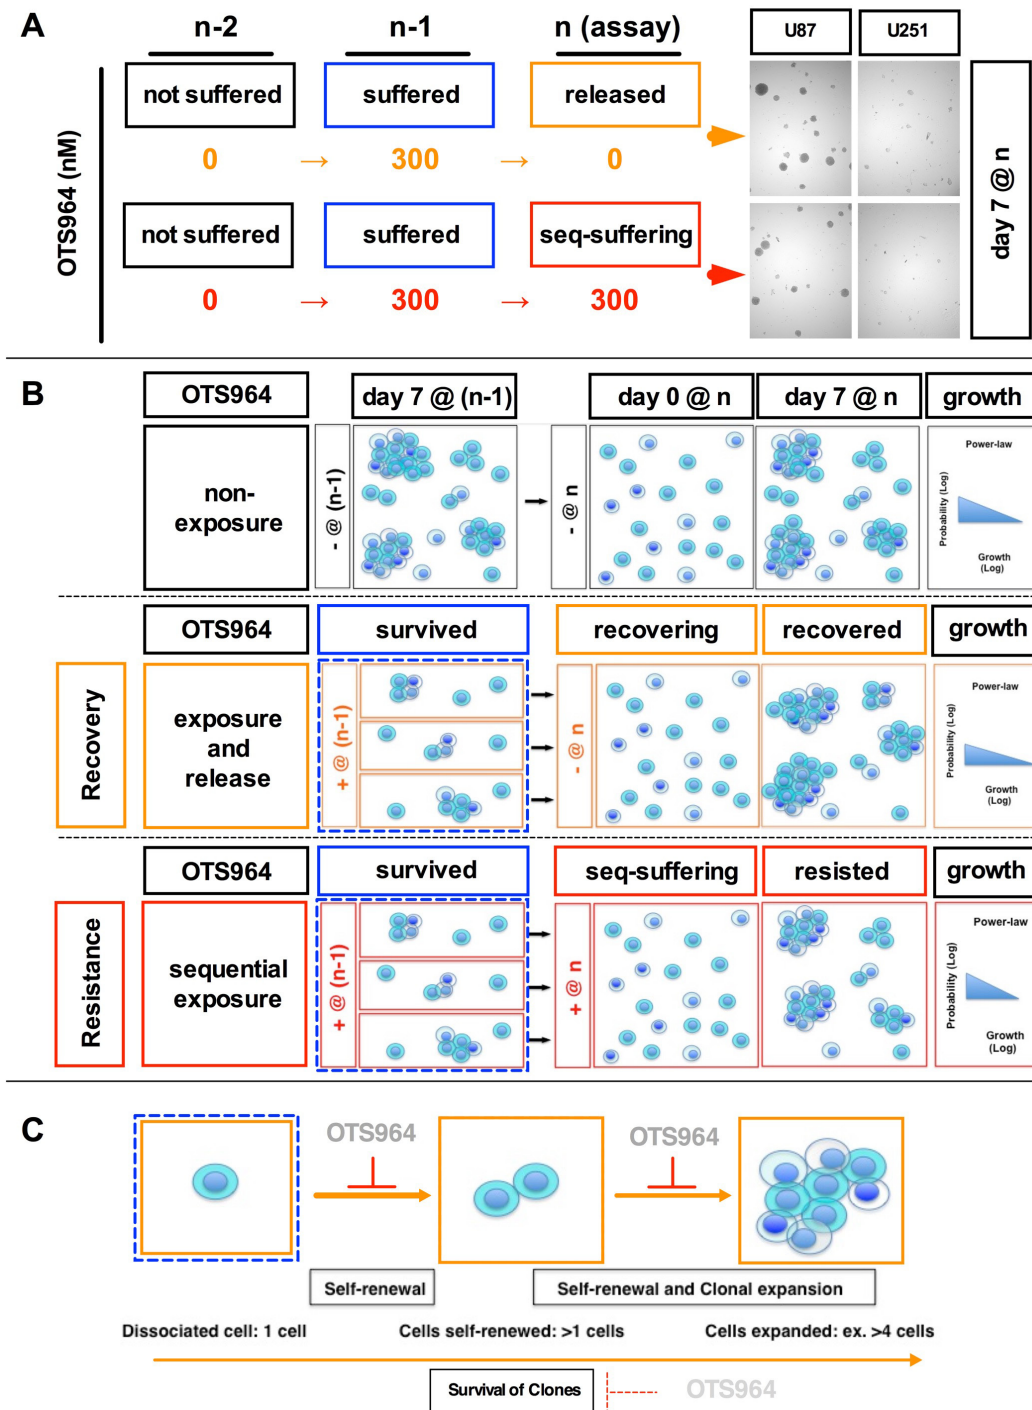

**Supplementary Figure 3: Recovery and resistance of OTS964-suffered GS populations while maintaining a power-law.** (A) The experimental paradigms for assaying the recovery and the resistance of heterogeneous GS populations after administration of OTS964 (left): GS clones, were suffered from 300 nM of OTS964 at ( $n-1$ )-th generations, and were conducted to assays. The released and the sequentially suffering (seq-suffering) GS clones (boxed in orange and red lines, respectively) were assayed at an assay ( $n$ : assay) generation. Representative pictures of the released/seq-suffering GS clones derived from U87- and U251-cell lines (right). (B) Schematic diagrams for series of the control-, the recovery- and the resistance-assaying experiments (boxed in the black-, orange- and red-lines, respectively). GS populations were suffered and survived to exposure of OTS964 (@  $n-1$ ); boxed in the dashed blue-lines; they are in line with the survived populations shown in Supplementary Figure 2C), and then passaged/dissociated to conduct assays in the following generations (@  $n$ ). OTS964-suffered GS populations recovered the growth and the size of populations, while they exhibit resistance to the sequential exposure of OTS964 during the recovering phase. Power-law growth was maintained in the recovered and resisted GS populations. (C) A schematic diagram of the growth of OTS964-suffered GS clones. OTS964-suffered GS clones (boxed in dashed blue-lines) survive, re-grow and expand for recovering the size of GS populations (Boxed/drawn in orange lines/arrows); resist the clone-eliminating efficacy in the sequential exposure of OTS964 during the recovering growth (indicated in the blunt ended dashed red-lines).

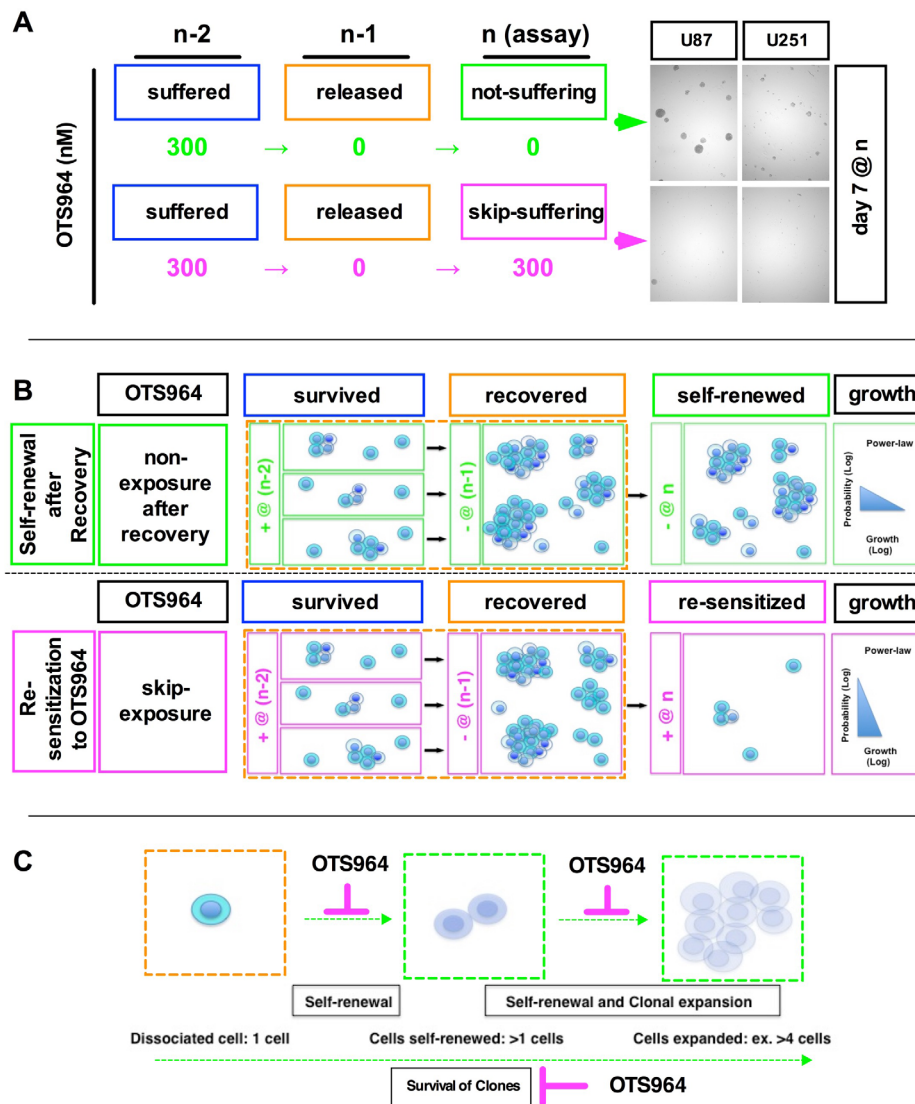

**Supplementary Figure 4: Self-renewal of the recovered GS populations and re-sensitization to OTS964 while maintaining a power-law.** (A) The experimental paradigm for assaying the sensitivity to OTS964 during the self-renewal of recovered heterogeneous GS populations (left): GS clones, were suffered from 300 nM of OTS964 at ( $n-2$ )-th generations (boxed in blue lines), then released from OTS964 to recover the size of the GS populations at ( $n-1$ )-th generations (boxed in orange lines). The recovered GS populations were dissociated to conduct assays to address if the recovered GS populations are able to self-renew in the following  $n$ -th generations (boxed in green lines). The  $n$ -th GS clones were grown and assayed in the absence/presence (not-suffering in the green-lined box for the absence, skip-suffering in the magenta-lined box for the presence, respectively) of OTS964 during the self-renewal of the recovered-GS populations. Representative pictures of the not-suffering/skip-suffering GS clones derived from U87- and U251-cell lines (right). (B) Schematic diagrams for series of experiments for assaying the self-renewal and for the re-sensitivity (boxed in the green- and magenta-lines, respectively). GS populations were suffered and survived to exposure of OTS964, and then passaged/dissociated to recover the size of GS populations ( $@ (n-2)$  and  $@ (n-1)$ ); boxed in the dashed orange-lines; they are in line with the diagrams shown in Supplementary Figure 3B). The recovered GS populations were passaged to conduct assays in the following generations ( $@ n$ ) in the absence/presence of OTS964 (green- and magenta-lined boxes for the absence and the presence of OTS964, respectively). The recovered GS populations were able to self-renew (self-renewed: in the green-lined box), while they exhibit re-sensitivity to the skip-exposure of OTS964 during the self-renewal (re-sensitized: in the magenta-lined box). Power-law growth was maintained in both the self-renewed and re-sensitized GS populations. (C) A schematic diagram of the growth of the recovered GS clones during the self-renewal. OTS964-recovered GS clones (boxed in dashed orange-lines) survive, re-grow and expand for self-renewing the GS populations (boxed/drawn in dashed green lines/arrows); the recovered “once-resistant” GS clones re-sensitize to the skip-exposure of OTS964 (suppression of the survival, of the self-renewal and of the clonal expansion, indicated in the blunt ended magenta-lines).

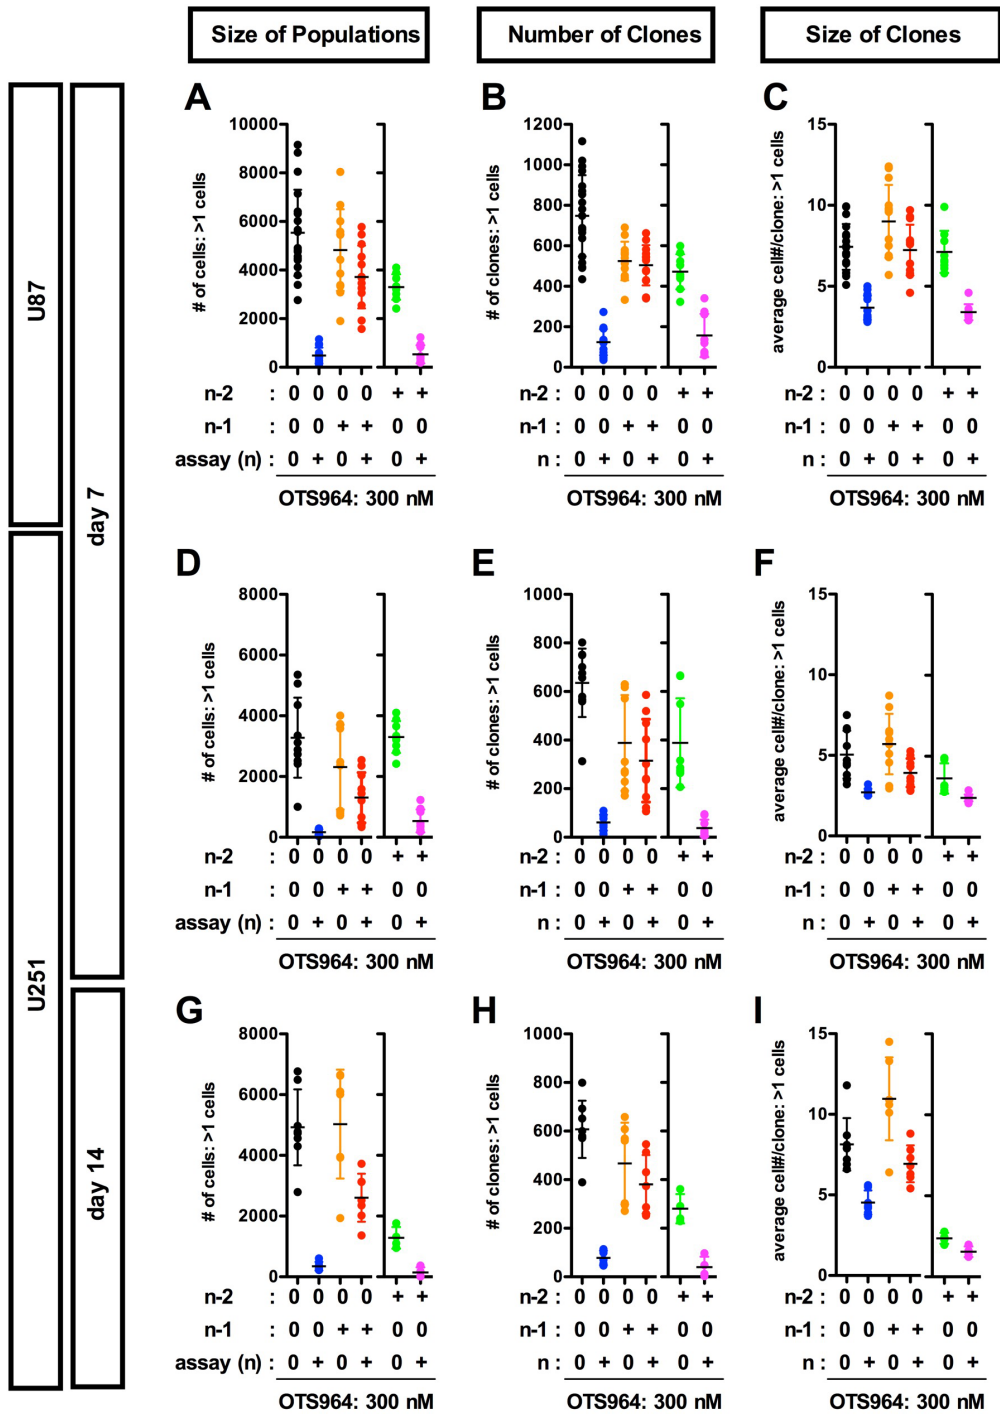

**Supplementary Figure 5: Functional reproducibility of self-renewed GS clones in the sensitivity and the resistance to OTS964.** (A–I) The data came from the self-renewed clones of U87- and U251-derived (A–C for U87-derived and D–I for U251-derived GS clones, respectively). GS clones were developed in the absence (0 nM, black circle) and the presence of 300 nM (blue) of OTS964 in the assayed culture ( $n$ ) at day 7 (A–F) and at day 14 (G–I). When 300 nM of OTS964 was administered in a generation ( $n-1$ ), then an assay was conducted in the absence (orange) and the presence (red) of OTS964 in the following assayed generations ( $n$ ). When 300 nM of OTS964 was once administered at a generation ( $n-2$ ) of GS clones, and then a population was reconstructed ( $n-1$ ) in the absence of OTS964. The reconstructed population was again dissociated and assayed at the following generations ( $n$ ) in the absence or presence (green or magenta, respectively) of OTS964.



**A**

|      |        | Size of Populations |         |         |           |         | Number of Clones |             |         |         |           | Size of Clones |           |             |         |         |           |         |           |
|------|--------|---------------------|---------|---------|-----------|---------|------------------|-------------|---------|---------|-----------|----------------|-----------|-------------|---------|---------|-----------|---------|-----------|
| U87  | day 7  | OTS964 (nM)         | 0_0_300 | 0_300_0 | 0_300_300 | 300_0_0 | 300_0_300        | OTS964 (nM) | 0_0_300 | 0_300_0 | 0_300_300 | 300_0_0        | 300_0_300 | OTS964 (nM) | 0_0_300 | 0_300_0 | 0_300_300 | 300_0_0 | 300_0_300 |
|      |        | 0_0_0               | **      | ns      | **        | **      | **               | **          | **      | **      | **        | **             | **        | **          | **      | *       | ns        | ns      | **        |
| U251 | day 7  | OTS964 (nM)         | 0_0_300 | 0_300_0 | 0_300_300 | 300_0_0 | 300_0_300        | OTS964 (nM) | 0_0_300 | 0_300_0 | 0_300_300 | 300_0_0        | 300_0_300 | OTS964 (nM) | 0_0_300 | 0_300_0 | 0_300_300 | 300_0_0 | 300_0_300 |
|      |        | 0_0_0               | **      | ns      | **        | **      | **               | **          | **      | **      | **        | ns             | **        | **          | **      | ns      | ns        | *       | **        |
| U87  | day 14 | OTS964 (nM)         | 0_0_300 | 0_300_0 | 0_300_300 | 300_0_0 | 300_0_300        | OTS964 (nM) | 0_0_300 | 0_300_0 | 0_300_300 | 300_0_0        | 300_0_300 | OTS964 (nM) | 0_0_300 | 0_300_0 | 0_300_300 | 300_0_0 | 300_0_300 |
|      |        | 0_0_0               | **      | ns      | **        | **      | **               | **          | *       | **      | **        | ns             | **        | **          | **      | ns      | ns        | **      | **        |
| U251 | day 14 | OTS964 (nM)         | 0_0_300 | 0_300_0 | 0_300_300 | 300_0_0 | 300_0_300        | OTS964 (nM) | 0_0_300 | 0_300_0 | 0_300_300 | 300_0_0        | 300_0_300 | OTS964 (nM) | 0_0_300 | 0_300_0 | 0_300_300 | 300_0_0 | 300_0_300 |
|      |        | 0_0_0               | **      | ns      | **        | **      | **               | **          | **      | **      | ns        | **             | **        | **          | **      | ns      | ns        | *       | **        |

**B**

|      |        | Size of Populations (>1) |         |         |           |         | Number of Clones (>1) |             |         |         |           | Size of Clones (>1) |           |             |         |         |           |         |           |
|------|--------|--------------------------|---------|---------|-----------|---------|-----------------------|-------------|---------|---------|-----------|---------------------|-----------|-------------|---------|---------|-----------|---------|-----------|
| U87  | day 7  | OTS964 (nM)              | 0_0_300 | 0_300_0 | 0_300_300 | 300_0_0 | 300_0_300             | OTS964 (nM) | 0_0_300 | 0_300_0 | 0_300_300 | 300_0_0             | 300_0_300 | OTS964 (nM) | 0_0_300 | 0_300_0 | 0_300_300 | 300_0_0 | 300_0_300 |
|      |        | 0_0_0                    | **      | ns      | **        | **      | **                    | **          | **      | **      | **        | **                  | **        | **          | **      | **      | **        | ns      | **        |
| U251 | day 7  | OTS964 (nM)              | 0_0_300 | 0_300_0 | 0_300_300 | 300_0_0 | 300_0_300             | OTS964 (nM) | 0_0_300 | 0_300_0 | 0_300_300 | 300_0_0             | 300_0_300 | OTS964 (nM) | 0_0_300 | 0_300_0 | 0_300_300 | 300_0_0 | 300_0_300 |
|      |        | 0_0_0                    | **      | ns      | **        | **      | **                    | **          | **      | **      | **        | **                  | **        | **          | **      | ns      | ns        | *       | **        |
| U87  | day 14 | OTS964 (nM)              | 0_0_300 | 0_300_0 | 0_300_300 | 300_0_0 | 300_0_300             | OTS964 (nM) | 0_0_300 | 0_300_0 | 0_300_300 | 300_0_0             | 300_0_300 | OTS964 (nM) | 0_0_300 | 0_300_0 | 0_300_300 | 300_0_0 | 300_0_300 |
|      |        | 0_0_0                    | **      | ns      | **        | **      | **                    | **          | **      | **      | ns        | **                  | **        | **          | **      | ns      | ns        | *       | **        |
| U251 | day 14 | OTS964 (nM)              | 0_0_300 | 0_300_0 | 0_300_300 | 300_0_0 | 300_0_300             | OTS964 (nM) | 0_0_300 | 0_300_0 | 0_300_300 | 300_0_0             | 300_0_300 | OTS964 (nM) | 0_0_300 | 0_300_0 | 0_300_300 | 300_0_0 | 300_0_300 |
|      |        | 0_0_0                    | **      | ns      | **        | **      | **                    | **          | **      | **      | ns        | **                  | **        | **          | **      | ns      | ns        | *       | **        |

**Supplementary Figure 6: Statistical analysis for Figure 4 and Supplementary Figure 5.** (A, B) The tables show the results of One-way ANOVA analysis where data of different OTS964-administration paradigms were compared in the differences in the size of the populations (left), the number of clones (middle) and the size of clones (right). The data came from U87- and U251-derived GS clones at day 7 and 14 as shown in the Figure 4 (A) and Supplementary Figure 5 (B), respectively. The asterisks in the parentheses indicate the results of the comparison by Student *t*-test (300\_0\_0 for the self-renewed versus 300\_0\_300 for the re-sensitized GS populations; they are in line with the diagrams shown in Supplementary Figure 4B).
